# Supplementary material for: BRAF and MEK Targeted Therapies in Pediatric Central Nervous System Tumors
Source: MDPI journal article supplement (doi:10.3390/cancers14174264), 2022-08-31
Supplement: s1 [file s1]

**Table S1.** Clinical trials summarized in the paper, available on <https://clinicaltrials.gov/ct2/home>.

| Official Title                                                                                                                                                                                                                                                                                                                                                          | ClinicalTrials.gov Identifier | Actual Study Start Date                                                   | Recruitment Status     | Drug or Intervention     |
|-------------------------------------------------------------------------------------------------------------------------------------------------------------------------------------------------------------------------------------------------------------------------------------------------------------------------------------------------------------------------|-------------------------------|---------------------------------------------------------------------------|------------------------|--------------------------|
| <i>A Phase 1 and Phase II and Re-Treatment Study of AZD6244 for Recurrent or Refractory Pediatric Low-Grade Glioma</i>                                                                                                                                                                                                                                                  | NCT01089101                   | April 19, 2010                                                            | Active, not recruiting | Selumetinib              |
| <i>A Phase 3 Randomized Non-Inferiority Study of Carboplatin and Vincristine Versus Selumetinib (NSC# 748727) in Newly Diagnosed or Previously Untreated Low-Grade Glioma (LGG) Not Associated With BRAFV600E Mutations or Systemic Neurofibromatosis Type 1 (NF1)</i>                                                                                                  | NCT04166409                   | January 3, 2020                                                           | Recruiting             | Selumetinib Sulfate      |
| <i>An Open-Label, Dose-Escalation, Phase I/II Study to Investigate the Safety, Pharmacokinetics, Pharmacodynamics and Clinical Activity of the MEK Inhibitor Trametinib in Children and Adolescents Subjects With Cancer or Plexiform Neurofibromas and Trametinib in Combination With Dabrafenib in Children and Adolescents With Cancers Harboring V600 Mutations</i> | NCT02124772                   | January 15, 2015                                                          | Completed              | Trametinib<br>Dabrafenib |
| <i>Phase I/IIa, 2-Part, Multi-Center, Single-Arm, Open-Label Study to Determine the Safety, Tolerability and Pharmacokinetics of Oral Dabrafenib in Children and Adolescent Subjects With Advanced BRAF V600-Mutation Positive Solid Tumors</i>                                                                                                                         | NCT01677741                   | May 23, 2013                                                              | Completed              | Dabrafenib               |
| <i>A Phase I Study of DAY101 (Formerly TAK-580, MLN2480) for Children With Low-Grade Gliomas and Other RAS/RAF/MEK/ERK Pathway Activated Tumors</i>                                                                                                                                                                                                                     | NCT03429803                   | February 27, 2018                                                         | Active, not recruiting | DAY101                   |
| <i>A Randomized and Controlled Phase II National Protocol in Non NF1 Pediatric and AYA (Adolescent and Young Adults) Patients Bearing a Wild Type BRAF Gene Newly Diagnosed Comparing a Daily Oral MEK Inhibitor (Trametinib) Versus Weekly Vinblastine During 18 Months</i>                                                                                            | NCT05180825                   | Estimated start date was February 1, 2022, last update on January 6, 2022 | Not yet recruiting     | Trametinib               |
| <i>Phase II Open-label Global Study to Evaluate the Effect of Dabrafenib in Combination With Trametinib in Children and Adolescent Patients With BRAF V600 Mutation Positive Low Grade Glioma (LGG) or Relapsed or Refractory High Grade Glioma (HGG)</i>                                                                                                               | NCT02684058                   | December 28, 2017                                                         | Active, not recruiting | Dabrafenib<br>Trametinib |

|                                                                                                                                                                                                        |             |                 |                        |                                                    |
|--------------------------------------------------------------------------------------------------------------------------------------------------------------------------------------------------------|-------------|-----------------|------------------------|----------------------------------------------------|
| <i>SJ901: Phase 1/2 Evaluation of Single Agent Mirdametininib (PD-0325901), a Brain-Penetrant MEK1/2 Inhibitor, for the Treatment of Children, Adolescents, and Young Adults With Low-Grade Glioma</i> | NCT04923126 | June 21, 2021   | Recruiting             | Mirdametininib                                     |
| <i>A Phase 2 Study of Dabrafenib (NSC# 763760) With Trametinib (NSC# 763093) After Local Irradiation in Newly-Diagnosed BRAF V600-Mutant High-Grade Glioma (HGG)</i>                                   | NCT03919071 | October 2, 2019 | Recruiting             | Dabrafenib Mesylate, Trametinib, Radiation Therapy |
| <i>NCI-COG Pediatric MATCH (Molecular Analysis for Therapy Choice)- Phase 2 Subprotocol of Vemurafenib in Patients With Tumors Harboring BRAF V600 Mutations</i>                                       | NCT03220035 | July 24, 2017   | Active, not recruiting | Vemurafenib                                        |
| <i>A Phase I/II, Multicenter, Open-Label, Dose-Escalation Study of the Safety and Pharmacokinetics of Cobimetinib In Pediatric and Young Adult Patients With Previously Treated Solid Tumors</i>       | NCT02639546 | May 20, 2016    | Completed              | Cobimetinib                                        |
